# Supplementary material for: HPLC-DAD-MS Identification and Quantification of Phenolic Components in Japanese Knotweed and American Pokeweed Extracts and Their Phytotoxic Effect on Seed Germination
Source: MDPI journal article supplement (doi:10.3390/plants11223053), 2022-11-11
Supplement: s1 [file s1]

**Supplementary Table S2** Identification of phenolic compounds in American pokeweed in negative ionization with HPLC-MS and MS<sup>2</sup>/MS<sup>3</sup>

| Phenolic group                           | $\lambda$<br>(nm) | [M-H] <sup>-</sup> ( <i>m/z</i> ) | MS <sup>2</sup><br>( <i>m/z</i> ) | MS <sup>3</sup><br>( <i>m/z</i> ) |
|------------------------------------------|-------------------|-----------------------------------|-----------------------------------|-----------------------------------|
| <b>Hydroxycinnamic acid derivatives</b>  |                   |                                   |                                   |                                   |
| 3- <i>p</i> -Coumaroylquinic acid        | 312               | 337                               | 163                               |                                   |
| 3-Feruloylquinic acid                    | 320               | 367                               | 193,134                           | 149                               |
| 3-Caffeoylquinic acid                    | 234, 326          | 353                               | 191, 179, 135                     | 173, 127, 85                      |
| 4-Caffeoylquinic acid                    | 234, 328          | 353                               | 173, 179                          |                                   |
| 4- <i>p</i> -Coumaroylquinic acid        | 312               | 337                               | 173, 163, 155, 137, 191           |                                   |
| 5-Caffeoylquinic acid 1                  | 234,328           | 353                               | 191,179,135                       | 173,127,85                        |
| 5-Caffeoylquinic acid 2                  | 234,328           | 353                               | 191,179,135                       |                                   |
| 5- <i>p</i> -Coumaroylquinic acid 1      | 312               | 337                               | 191,173,163                       |                                   |
| 5- <i>p</i> -Coumaroylquinic acid 2      | 311               | 337                               | 191,163,173                       |                                   |
| Dicaffeoylquinic acid 1                  | 246,316           | 515                               | 353                               | 179,173                           |
| Dicaffeoylquinic acid 2                  | 246, 316          | 515                               | 353                               | 179,173                           |
| <i>p</i> -Coumaric acid hexoside         | 322,275           | 325                               | 163,119                           |                                   |
| <i>p</i> -Coumaric acid                  | 310               | 163                               | 119                               |                                   |
| <b>Flavanols</b>                         |                   |                                   |                                   |                                   |
| Epicatechin                              | 234,279           | 289                               | 245                               |                                   |
| Catechin                                 | 234,279           | 289                               | 245                               |                                   |
| Catechin gallate                         | 235,280           | 441                               | 289,169,135                       |                                   |
| Catechin hexoside                        | 235,280           | 451                               | 289                               |                                   |
| <b>Flavones</b>                          |                   |                                   |                                   |                                   |
| Apigenin dihexoside                      | 268,331           | 431                               | 269                               |                                   |
| <b>Flavonols</b>                         |                   |                                   |                                   |                                   |
| Kaempferol glucuronyl dihexoside         | 348, 265          | 785                               | 609                               | 285                               |
| Kaempferol glucuronyl pentoside hexoside | 347, 266          | 755                               | 579                               | 285                               |
| Kaempferol hexoside                      | 266,346           | 447                               | 285                               |                                   |
| Kaempferol-3-rutinoside                  | 264,345           | 593                               | 285                               |                                   |
| Kaempferol pentosyl hexoside             | 266, 347          | 579                               | 447                               | 285                               |
| Kaempferol rhamnosyl dihexoside          | 265, 346          | 755                               | 609                               | 285                               |
| Quercetin-3-xyloside                     | 356,255           | 433                               | 301                               |                                   |
| Quercetin-3-arabinofuranoside            | 355,255           | 433                               | 301                               |                                   |
| Quercetin dihexoside                     | 255,356           | 625                               | 301                               |                                   |
| Quercetin pentosyl hexoside 1            | 256,355           | 595                               | 463                               | 301                               |
| Quercetin pentosyl hexoside 2            | 256,356           | 595                               | 463                               | 301                               |
| Quercetin rhamnosyl hexoside             | 255,355           | 609                               | 463                               | 301                               |
| Quercetin-3-glucoside                    | 255,355           | 463                               | 301                               |                                   |
| <b>Stilbenes</b>                         |                   |                                   |                                   |                                   |
| Piceatannol hexoside 1                   | 324               | 405                               | 243                               |                                   |
| Piceatannol hexoside 2                   | 324               | 405                               | 243                               |                                   |
| Piceatannol hexoside 3                   | 324               | 405                               | 243                               |                                   |
