# Supplementary material for: HPLC-DAD-MS Identification and Quantification of Phenolic Components in Japanese Knotweed and American Pokeweed Extracts and Their Phytotoxic Effect on Seed Germination
Source: MDPI journal article supplement (doi:10.3390/plants11223053), 2022-11-11
Supplement: s1 [file s1]

**Supplementary Table S4.** Content of phenolic compounds and standard error (mg/ml) (flavones are expressed in µg/ml) in American pokeweed water extracts with different times of extraction. Different letters in rows denote statistically significant differences between different times with Tukey's HSD test. (T1 = 1 hour of extraction, T2 = 12 hours of extraction, T3 = 24 hours of extraction, T4 = 48 hours of extraction and T5 = 84 hours of extraction)

| Phenolic group                           | T1                     | T2                      | T3                     | T4                     | T5                     |
|------------------------------------------|------------------------|-------------------------|------------------------|------------------------|------------------------|
| <b>Hydroxycinnamic acid derivatives</b>  | <b>45.42 ± 1.56 bc</b> | <b>50.91 ± 2.77 ab</b>  | <b>54.18 ± 2.66 a</b>  | <b>48.03 ± 1.67 ab</b> | <b>37.36 ± 0.17 c</b>  |
| 3- <i>p</i> -Coumaroylquinic acid        | 0.74 ± 0.06 c          | 0.99 ± 0.16 bc          | 1.32 ± 0.06 ab         | 1.48 ± 0.06 a          | 1.02 ± 0.06 bc         |
| 3-Feruloylquinic acid                    | 0.42 ± 0.01 a          | 0.42 ± 0.03a            | 0.38 ± 0.02 a          | 0.36 ± 0.002 ab        | 0.31 ± 0.007 b         |
| 3-Caffeoylquinic acid                    | 9.72 ± 0.28 a          | 9.93 ± 0.96 a           | 9.11 ± 0.24 ab         | 7.90 ± 0.42 ab         | 7.01 ± 0.23 b          |
| 4-Caffeoylquinic acid                    | 27.79 ± 0.98 a         | 26.99 ± 1.76 ab         | 24.14 ± 0.96 ab        | 22.79 ± 0.14 bc        | 18.86 ± 0.48 c         |
| 4- <i>p</i> -Coumaroylquinic acid        | 1.08 ± 0.07 b          | 1.32 ± 0.16 b           | 1.71 ± 0.07 a          | 1.72 ± 0.03 a          | 0.96 ± 0.02 b          |
| 5-Caffeoylquinic acid 1                  | 2.40 ± 0.3 c           | 7.00 ± 1.29 b           | 10.98 ± 0.87 a         | 7.34 ± 0.95 ab         | 3.98 ± 0.35 bc         |
| 5-Caffeoylquinic acid 2                  | 1.26 ± 0.12 b          | 1.27 ± 0.22 b           | 2.46 ± 0.15 a          | 2.42 ± 0.07 a          | 2.19 ± 0.03 a          |
| 5- <i>p</i> -Coumaroylquinic acid 1      | 1.05 ± 0.14 b          | 1.50 ± 0.25 ab          | 1.98 ± 0.08 a          | 1.93 ± 0.08 a          | 1.43 ± 0.05 ab         |
| 5- <i>p</i> -Coumaroylquinic acid 2      | 0.20 ± 0.12 b          | 0.68 ± 0.18 ab          | 1.12 ± 0.22 a          | 0.87 ± 0.06 a          | 0.59 ± 0.02 ab         |
| Dicaffeoylquinic acid 1                  | 0.04 ± 0.002 a         | 0.04 ± 0.001 a          | 0.04 ± 0.01 a          | 0.03 ± 0.007 a         | 24.27 ± 1.31 a         |
| Dicaffeoylquinic acid 2                  | 0.42 ± 0.02 a          | 0.37 ± 0.03 a           | 0.40 ± 0.11 a          | 0.31 ± 0.06 a          | 334.86 ± 3.14 a        |
| <i>p</i> -Coumaric acid hexoside         | 0.26 ± 0.07 c          | 0.40 ± 0.11 bc          | 0.47 ± 0.03 bc         | 0.82 ± 0.09 a          | 0.61 ± 0.06 ab         |
| <i>p</i> -Coumaric acid                  | 0.03 ± 0.004 b         | 0.05 ± 0.01 ab          | 0.06 ± 0.01 a          | 0.06 ± 0.002 a         | 0.04 ± 0.002 ab        |
| <b>Flavanols</b>                         | <b>13.27 ± 0.80 b</b>  | <b>17.89 ± 4.32 ab</b>  | <b>19.68 ± 1.00 ab</b> | <b>24.4 ± 1.58 a</b>   | <b>18.90 ± 0.67 ab</b> |
| Epicatechin                              | 4.14 ± 0.4 b           | 4.18 ± 0.72 b           | 8.11 ± 0.50 a          | 7.97 ± 0.24 a          | 7.21 ± 0.10 a          |
| Catechin                                 | 0.98 ± 0.08 c          | 1.31 ± 0.22 bc          | 1.75 ± 0.08 ab         | 1.96 ± 0.07 a          | 1.34 ± 0.08 bc         |
| Catechin gallate                         | 3.26 ± 0.14 a          | 4.96 ± 1.26 a           | 3.93 ± 0.19 a          | 5.80 ± 0.51 a          | 4.14 ± 0.26 a          |
| Catechin hexoside                        | 4.89 ± 0.21 a          | 7.44 ± 2.04 a           | 5.89 ± 0.29 a          | 8.69 ± 0.77 a          | 6.21 ± 0.39 a          |
| <b>Flavones</b>                          | <b>67.15 ± 2.92 ab</b> | <b>61.54 ± 4.13 ab</b>  | <b>79.26 ± 5.89 a</b>  | <b>52.81 ± 5.15 b</b>  | <b>53.03 ± 0.50 b</b>  |
| Apigenin dihexoside                      | 67.15 ± 2.92 ab        | 61.54 ± 4.13 ab         | 79.26 ± 5.89 a         | 52.81 ± 5.15 b         | 53.03 ± 0.50 b         |
| <b>Flavonols</b>                         | <b>18.47 ± 0.59 a</b>  | <b>16.64 ± 0.46 a</b>   | <b>16.28 ± 2.64 a</b>  | <b>12.93 ± 1.62 ab</b> | <b>8.65 ± 0.22 b</b>   |
| Kaempferol glucuronyl dihexoside         | 0.32 ± 0.06 a          | 0.21 ± 0.03 a           | 0.31 ± 0.10 a          | 0.14 ± 0.03 a          | 0.29 ± 0.04 a          |
| Kaempferol glucuronyl pentoside hexoside | 0.08 ± 0.02 a          | 0.09 ± 0.02 a           | 0.13 ± 0.04 a          | 0.05 ± 0.01 a          | 0.04 ± 0.003 a         |
| Kaempferol hexoside                      | 1.05 ± 0.06 a          | 0.92 ± 0.03 a           | 0.90 ± 0.23 a          | 0.78 ± 0.16 a          | 0.59 ± 0.03 a          |
| Kaempferol-3-rutinoside                  | 1.98 ± 0.08 a          | 1.74 ± 0.03 a           | 1.95 ± 0.23 a          | 1.85 ± 0.18 a          | 1.45 ± 0.03 a          |
| Kaempferol pentosyl hexoside             | 2.81 ± 0.15 a          | 2.65 ± 0.03 a           | 2.80 ± 0.40 a          | 2.46 ± 0.34 a          | 1.03 ± 0.07 b          |
| Kaempferol rhamnosyl dihexoside          | 0.82 ± 0.08 a          | 0.81 ± 0.07 a           | 0.67 ± 0.13 a          | 0.62 ± 0.08 a          | 0.55 ± 0.02 a          |
| Quercetin-3-xyloside                     | 0.85 ± 0.12 a          | 0.71 ± 0.07 a           | 0.70 ± 0.30 a          | 0.50 ± 0.14 a          | 0.63 ± 0.13 a          |
| Quercetin-3-arabinofuranoside            | 0.02 ± 0.001 a         | 0.01 ± 0.001 a          | 0.01 ± 0.003 a         | 0.01 ± 0.002 a         | 0.01 ± 0.001 a         |
| Quercetin dihexoside                     | 0.35 ± 0.02 a          | 0.29 ± 0.07 a           | 0.53 ± 0.19 a          | 0.28 ± 0.11 a          | 0.41 ± 0.04 a          |
| Quercetin pentosyl hexoside 1            | 0.99 ± 0.03 a          | 0.84 ± 0.04 ab          | 0.86 ± 0.17 ab         | 0.62 ± 0.10 ab         | 0.55 ± 0.03 b          |
| Quercetin pentosyl hexoside 2            | 4.69 ± 0.14 a          | 4.19 ± 0.09 a           | 3.92 ± 0.42 ab         | 2.97 ± 0.26 b          | 1.51 ± 0.05 c          |
| Quercetin rhamnosyl hexoside             | 0.72 ± 0.02 a          | 0.62 ± 0.03 ab          | 0.63 ± 0.12 ab         | 0.45 ± 0.07 ab         | 0.40 ± 0.02 b          |
| Quercetin-3-glucoside                    | 3.81 ± 0.14 a          | 3.56 ± 0.06 a           | 2.89 ± 0.38 ab         | 2.19 ± 0.26 b          | 1.19 ± 0.06 c          |
| <b>Stilbenes</b>                         | <b>18.68 ± 0.81 c</b>  | <b>20.37 ± 2.91 c</b>   | <b>34.62 ± 1.93 ab</b> | <b>37.33 ± 0.69 a</b>  | <b>28.76 ± 1.69 b</b>  |
| Piceatannol hexoside 1                   | 5.71 ± 0.43 b          | 6.47 ± 0.94 b           | 11.51 ± 1.23 a         | 11.11 ± 0.59 a         | 9.92 ± 0.27 a          |
| Piceatannol hexoside 2                   | 6.99 ± 0.35 c          | 6.71 ± 1.03 c           | 13.64 ± 0.36 b         | 16.98 ± 0.34 a         | 13.45 ± 0.80 b         |
| Piceatannol hexoside 3                   | 5.98 ± 0.37 b          | 7.19 ± 1.16 ab          | 9.47 ± 0.68 a          | 9.24 ± 0.17 a          | 5.38 ± 0.24 b          |
| <b>Total polyphenolics</b>               | <b>95.91 ± 2.74 b</b>  | <b>105.87 ± 9.52 ab</b> | <b>124.84 ± 7.81 a</b> | <b>122.76 ± 3.15 a</b> | <b>93.71 ± 0.89 b</b>  |
