# Supplementary material for: HPLC-DAD-MS Identification and Quantification of Phenolic Components in Japanese Knotweed and American Pokeweed Extracts and Their Phytotoxic Effect on Seed Germination
Source: MDPI journal article supplement (doi:10.3390/plants11223053), 2022-11-11
Supplement: s1 [file s1]

**Supplementary Table S3.** Content of phenolic compounds and standard error (mg/ml) (quinones and flavones are expressed in µg/ml) in Japanese knotweed water extracts with different times of extraction. Different letters in rows denote statistically significant differences between different times with Tukey's HSD test. (T1 = 1 hour of extraction, T2 = 12 hours of extraction, T3 = 24 hours of extraction, T4 = 48 hours of extraction and T5 = 84 hours of extraction)

| Phenolic group                      | T1                     | T2                     | T3                     | T4                    | T5                     |
|-------------------------------------|------------------------|------------------------|------------------------|-----------------------|------------------------|
| <b>Total hydroxybenzoic acids</b>   | <b>12.81 ± 1.63 a</b>  | <b>10.89 ± 0.96 a</b>  | <b>12.63 ± 1.08 a</b>  | <b>12.95 ± 0.80 a</b> | <b>15.59 ± 1.09 a</b>  |
| Gallic acid                         | 7.37 ± 0.99 a          | 6.51 ± 0.54 a          | 7.55 ± 0.61 a          | 7.76 ± 0.41 a         | 9.69 ± 0.74 a          |
| Galloylhexoside 1                   | 3.81 ± 0.60 a          | 3.32 ± 0.30 a          | 3.64 ± 0.38 a          | 3.92 ± 0.30 a         | 4.18 ± 0.24 a          |
| Galloylhexoside 2                   | 1.63 ± 0.13 ab         | 1.06 ± 0.14 b          | 1.45 ± 0.18 ab         | 1.27 ± 0.11 ab        | 1.72 ± 0.13 a          |
| <b>Total hydroxycinnamic acid</b>   | <b>1153.15 ± 41.11</b> | <b>1137.81 ± 23.59</b> | <b>1228.37 ± 79.87</b> | <b>971.83 ± 24.09</b> | <b>1051.61 ± 54.79</b> |
| 3-Feruloylquinic acid               | 0.19 ± 0.07 b          | 0.33 ± 0.11 ab         | 0.43 ± 0.02 ab         | 0.49 ± 0.01 a         | 0.50 ± 0.02 a          |
| 3-Caffeoylquinic acid               | 68.60 ± 2.16 a         | 69.72 ± 2.73 a         | 77.69 ± 3.47 a         | 69.39 ± 2.04 a        | 70.58 ± 2.49 a         |
| 3- <i>p</i> -Coumaroylquinic acid   | 3.76 ± 0.24 a          | 4.36 ± 0.23 a          | 4.37 ± 0.14 a          | 3.84 ± 0.06 a         | 3.85 ± 0.12 a          |
| 4-Caffeoylquinic acid               | 4.47 ± 0.16 ab         | 4.38 ± 0.08 ab         | 4.71 ± 0.32 a          | 3.67 ± 0.09 b         | 4.02 ± 0.22 ab         |
| 4- <i>p</i> -Coumaroylquinic acid   | 1.71 ± 0.27 b          | 1.89 ± 0.28 ab         | 2.53 ± 0.06 ab         | 2.79 ± 0.17 a         | 1.96 ± 0.33 ab         |
| 5- <i>p</i> -Coumaroylquinic acid 1 | 16.94 ± 1.30 a         | 16.50 ± 0.54 a         | 19.35 ± 1.09 a         | 16.28 ± 0.48 a        | 16.41 ± 0.60 a         |
| 5- <i>p</i> -Coumaroylquinic acid 2 | 3.48 ± 0.11 b          | 5.38 ± 0.20 a          | 5.20 ± 0.47 a          | 5.31 ± 0.15 a         | 5.63 ± 0.12 a          |
| 5-Caffeoylquinic acid 1             | 0.72 ± 0.11 a          | 0.74 ± 0.15 a          | 0.90 ± 0.02 a          | 0.68 ± 0.05 a         | 0.64 ± 0.12 a          |
| 5-Caffeoylquinic acid 2             | 1.76 ± 0.34 a          | 2.17 ± 0.25 a          | 2.18 ± 0.05 a          | 1.83 ± 0.17 a         | 1.41 ± 0.27 a          |
| <i>cis</i> -Coutaric acid           | 0.78 ± 0.12 a          | 0.81 ± 0.17 a          | 0.98 ± 0.03 a          | 0.74 ± 0.05 a         | 0.70 ± 0.13 a          |
| Dicaffeoylquinic acid 1             | 0.13 ± 0.04 ab         | 0.15 ± 0.02 ab         | 0.13 ± 0.03 ab         | 0.21 ± 0.04 a         | 0.07 ± 0.01 b          |
| Dicaffeoylquinic acid 2             | 0.02 ± 0.01 a          | 0.06 ± 0.03 a          | 0.08 ± 0.03 a          | 0.06 ± 0.04 a         | 0.05 ± 0.05 a          |
| Caftaric acid hexoside              | 1.11 ± 0.20 a          | 1.25 ± 0.08 a          | 1.38 ± 0.08 a          | 1.16 ± 0.12 a         | 0.45 ± 0.09 b          |
| <i>p</i> -Coumaric acid hexoside    | 0.29 ± 0.05 a          | 0.33 ± 0.02 a          | 0.37 ± 0.02 a          | 0.31 ± 0.03 a         | 0.12 ± 0.02 b          |
| Caftaric acid 1                     | 1042.10 ± 36.29        | 1020.06 ± 19.66        | 1098.53 ± 74.25        | 855.74 ± 20.02        | 937.45 ± 50.82         |
| Caftaric acid 2                     | 2.09 ± 0.07 b          | 3.23 ± 0.13 a          | 3.12 ± 0.29 a          | 3.19 ± 0.09 a         | 3.38 ± 0.07 a          |
| Ferulic acid pentoside              | 2.47 ± 0.48 a          | 3.03 ± 0.35 a          | 3.05 ± 0.07 a          | 2.56 ± 0.24 a         | 1.97 ± 0.38 a          |
| <i>trans</i> -Coutaric acid         | 2.47 ± 0.34 a          | 3.36 ± 0.52 a          | 3.30 ± 0.25 a          | 3.51 ± 0.64 a         | 2.35 ± 0.50 a          |
| <i>p</i> -Coumaric acid             | 0.06 ± 0.01 a          | 0.06 ± 0.01 a          | 0.08 ± 0.00 a          | 0.06 ± 0.00 a         | 0.06 ± 0.01 a          |
| <b>Total flavanols</b>              | <b>614.34 ± 54.94</b>  | <b>859.60 ± 72.10</b>  | <b>853.90 ± 34.44</b>  | <b>867.67 ± 49.64</b> | <b>781.91 ± 43.77</b>  |
| Epicatechin                         | 27.41 ± 0.89 b         | 42.32 ± 1.61 a         | 40.92 ± 3.73 a         | 41.82 ± 1.20 a        | 44.28 ± 0.92 a         |
| Catechin hexoside                   | 25.10 ± 1.98 a         | 22.00 ± 0.85 a         | 21.03 ± 0.89 a         | 15.92 ± 0.80 b        | 13.78 ± 0.53 b         |
| Catechin gallate                    | 0.76 ± 0.12 a          | 0.74 ± 0.17 a          | 0.56 ± 0.14 a          | 0.57 ± 0.09 a         | 0.27 ± 0.07 a          |
| Procyanidin dimer 1                 | 30.51 ± 1.55 bc        | 33.07 ± 0.70 ab        | 37.05 ± 0.58 a         | 31.35 ± 1.31 bc       | 26.70 ± 1.30 c         |
| Procyanidin dimer 2                 | 194.39 ± 39.36         | 341.68 ± 33.72         | 361.96 ± 14.31         | 415.67 ± 9.94 a       | 418.32 ± 12.91         |
| Procyanidin dimer 3                 | 16.75 ± 2.69 a         | 16.23 ± 3.65 a         | 12.35 ± 3.06 a         | 12.48 ± 2.00 a        | 5.95 ± 1.59 a          |
| Procyanidin tetramer 1              | 2.83 ± 0.09 b          | 4.37 ± 0.17 a          | 4.23 ± 0.39 a          | 4.32 ± 0.12 a         | 4.57 ± 0.10 a          |
| Procyanidin tetramer 2              | 55.31 ± 5.80 a         | 62.86 ± 4.38 a         | 69.73 ± 6.59 a         | 58.85 ± 3.09 a        | 56.57 ± 5.29 a         |
| Procyanidin tetramer 3              | 15.63 ± 0.71 a         | 22.12 ± 2.45 a         | 24.08 ± 1.80 a         | 23.99 ± 3.06 a        | 20.34 ± 2.59 a         |
| Procyanidin tetramer 4              | 7.18 ± 1.15 a          | 6.95 ± 1.56 a          | 5.29 ± 1.31 a          | 5.35 ± 0.84 a         | 2.55 ± 0.68 a          |
| Procyanidin trimer 1                | 15.80 ± 1.21 a         | 15.38 ± 0.51 a         | 18.04 ± 1.02 a         | 15.18 ± 0.45 a        | 15.31 ± 0.56 a         |
| Procyanidin trimer 2                | 5.83 ± 1.18 b          | 10.25 ± 1.01 a         | 10.86 ± 0.43 a         | 12.47 ± 0.30 a        | 12.55 ± 0.39 a         |
| Procyanidin trimer 3                | 79.60 ± 12.98          | 91.40 ± 11.41 a        | 84.95 ± 8.41 ab        | 85.15 ± 9.72 ab       | 46.19 ± 4.10 b         |
| Procyanidin trimer 4                | 9.55 ± 1.86 a          | 11.74 ± 1.34 a         | 11.82 ± 0.27 a         | 9.92 ± 0.94 a         | 7.63 ± 1.45 a          |
| Procyanidin trimer 5                | 2.08 ± 0.40 a          | 2.55 ± 0.29 a          | 2.57 ± 0.06 a          | 2.16 ± 0.20 a         | 1.66 ± 0.32 a          |
| Procyanidin trimer 6                | 59.48 ± 9.07 a         | 76.77 ± 12.04 a        | 70.47 ± 4.25 a         | 73.34 ± 8.08 a        | 55.23 ± 11.99 a        |
| Procyanidin trimer 7                | 66.13 ± 9.03 ab        | 99.19 ± 3.70 a         | 78.00 ± 6.64 ab        | 59.16 ± 10.14 b       | 50.02 ± 11.72 b        |
| <b>Total flavones</b>               | <b>222.01 ± 45.25</b>  | <b>207.98 ±</b>        | <b>219.90 ± 37.95</b>  | <b>312.58 ± 52.56</b> | <b>86.74 ± 4.88 b</b>  |
| Apigenin hexoside                   | 222.01 ± 45.25         | 207.98 ± 10.45         | 219.90 ± 37.95         | 312.58 ± 52.56        | 86.74 ± 4.88 b         |
| <b>Total flavonols</b>              | <b>49.17 ± 8.41 a</b>  | <b>48.67 ± 4.12 a</b>  | <b>46.90 ± 8.04 a</b>  | <b>55.60 ± 4.59 a</b> | <b>18.48 ± 0.30 b</b>  |
| Isorhamnetin hexoside               | 0.005 ± 0.001b         | 0.008 ± 0.001          | 0.01 ± 0.001 a         | 0.006 ± 0.001 b       | 0.002 ± 0.001 c        |
| Kaempferol hexoside                 | 0.14 ± 0.03 a          | 0.14 ± 0.02 a          | 0.12 ± 0.02 ab         | 0.12 ± 0.01 ab        | 0.05 ± 0.001 b         |
| Kaempferol-3-rhamnoside             | 0.25 ± 0.05 ab         | 0.32 ± 0.04 ab         | 0.25 ± 0.06 ab         | 0.37 ± 0.08 a         | 0.09 ± 0.005 b         |
| Kaempferol-3-rutinoside             | 0.007 ± 0.001          | 0.02 ± 0.001 a         | 0.01 ± 0.001 bc        | 0.01 ± 0.001 b        | 0.005 ± 0.0003         |
| Quercetin-3-xyloside                | 0.42 ± 0.06 b          | 0.82 ± 0.07 a          | 0.50 ± 0.08 ab         | 0.44 ± 0.14 b         | 0.24 ± 0.03 b          |
| Quercetin-3-arabinofuranoside       | 0.45 ± 0.69 ab         | 428.48 ± 0.02          | 0.43 ± 0.10 ab         | 0.89 ± 0.21 a         | 0.16 ± 0.06 b          |
| Quercetin acetyl hexoside           | 0.0005 ±               | 0.001 ± 0.0002         | 0.0006 ± 0.0003        | 0.001 ± 0.0004        | 0.001 ± 0.0004         |

| <b>Phenolic group</b>         | <b>T1</b>              | <b>T2</b>              | <b>T3</b>             | <b>T4</b>              | <b>T5</b>              |
|-------------------------------|------------------------|------------------------|-----------------------|------------------------|------------------------|
| Quercetin dihexoside          | 1.01 ± 0.14 b          | 1.22 ± 0.04 b          | 2.24 ± 0.36 ab        | 1.51 ± 0.09 a          | 1.07 ± 0.08 b          |
| Quercetin-3-arabinopyranoside | 0.43 ± 0.08 b          | 0.62 ± 0.08 ab         | 0.80 ± 0.04 a         | 0.46 ± 0.09 b          | 0.11 ± 0.04 c          |
| Quercetin-3-galactoside       | 1.79 ± 0.40 a          | 1.85 ± 0.21 a          | 1.45 ± 0.32 ab        | 1.64 ± 0.17 ab         | 0.62 ± 0.06 b          |
| Quercetin-3-glucoside         | 1.80 ± 0.36 a          | 1.78 ± 0.2 a           | 1.58 ± 0.31 ab        | 1.49 ± 0.16 ab         | 0.58 ± 0.04 b          |
| Quercetin-3-rhamnoside        | 40.18 ± 7.11 a         | 37.86 ± 3.38 a         | 36.08 ± 6.77 a        | 45.96 ± 3.70 a         | 13.89 ± 0.51 b         |
| Quercetin-3-rutinoside        | 2.60 ± 0.39 ab         | 3.41 ± 0.49 a          | 3.19 ± 0.46 ab        | 2.56 ± 0.26 ab         | 1.58 ± 0.15 b          |
| Myricetin-3-rhamnoside        | 0.09 ± 0.007 c         | 0.20 ± 0.01 ab         | 0.24 ± 0.02 a         | 0.15 ± 0.02 bc         | 0.08 ± 0.02 c          |
| <b>Quinones</b>               | <b>59,08 ± 7,70 a</b>  | <b>107,39 ± 22,02</b>  | <b>109,09 ± 34,88</b> | <b>105,73 ± 43,24</b>  | <b>58,86 ± 11,72 a</b> |
| Emodin hexoside               | 59.08 ± 7.70 a         | 107.39 ± 22.02         | 109.09 ± 34.88        | 105.73 ± 43.24         | 58.86 ± 11.72 a        |
| <b>Total stilbenes</b>        | <b>45.46 ± 2.80 ab</b> | <b>58.53 ± 5.04 a</b>  | <b>43.73 ± 0.90 b</b> | <b>32.27 ± 3.57 bc</b> | <b>22.43 ± 1.750 c</b> |
| Astringin                     | 0.26 ± 0.02 a          | 0.34 ± 0.04 a          | 0.34 ± 0.02 a         | 0.34 ± 0.02 a          | 0.31 ± 0.04 a          |
| <i>cis</i> -Resveratrolsoid   | 0.01 ± 0.001 ab        | 0.01 ± 0.001 ab        | 0.01 ± 0.003 ab       | 0.02 ± 0.01 a          | 0.002 ± 0.0002         |
| Piceatannol hexoside 1        | 16.46 ± 1.05 a         | 12.95 ± 1.97 ab        | 17.87 ± 0.88 a        | 10.20 ± 0.73 b         | 9.53 ± 0.65 b          |
| Piceatannol hexoside 2        | 0.24 ± 0.01 ab         | 0.33 ± 0.03 a          | 0.18 ± 0.03 bc        | 0.18 ± 0.01 bc         | 0.13 ± 0.01 c          |
| <i>trans</i> -Resveratrolsoid | 12.16 ± 0.66 ab        | 16.23 ± 1.63 a         | 8.94 ± 1.49 bc        | 9.05 ± 0.32 bc         | 6.25 ± 0.27 c          |
| <i>trans</i> -Piceid 1        | 15.54 ± 1.26 b         | 26.78 ± 3.68 a         | 14.36 ± 1.19 bc       | 11.27 ± 2.43 bc        | 5.56 ± 1.91 c          |
| <i>trans</i> -Piceid 2        | 0.80 ± 0.07 b          | 1.90 ± 0.17 a          | 2.03 ± 0.18 a         | 1.21 ± 0.19 b          | 0.65 ± 0.14 b          |
| <b>Total polyphenolics</b>    | <b>1875.20 ± 99.89</b> | <b>2115.82 ± 97.55</b> | <b>2185.86 ±</b>      | <b>1940.74 ± 75.74</b> | <b>1890.16 ± 90.72</b> |
