# Supplementary material for: HPLC-DAD-MS Identification and Quantification of Phenolic Components in Japanese Knotweed and American Pokeweed Extracts and Their Phytotoxic Effect on Seed Germination
Source: MDPI journal article supplement (doi:10.3390/plants11223053), 2022-11-11
Supplement: s1 [file s1]

**Supplementary Table S1.** Identification of phenolic compounds in Japanese knotweed in negative ionization with HPLC-MS and MS<sup>2</sup>/MS<sup>3</sup>

| Phenolic group                          | $\lambda$<br>(nm) | [M-H] <sup>-</sup><br>(m/z) | MS <sup>2</sup><br>(m/z)            | MS <sup>3</sup><br>(m/z) |
|-----------------------------------------|-------------------|-----------------------------|-------------------------------------|--------------------------|
| <b>Hydroxybenzoic acids derivatives</b> |                   |                             |                                     |                          |
| Gallic acid                             | 271               | 169                         | 125                                 |                          |
| Galloylhexoside 1                       | 276               | 331                         | 169                                 |                          |
| Galloylhexoside 2                       | 276               | 331                         | 169                                 |                          |
| <b>Hydroxycinnamic acid derivatives</b> |                   |                             |                                     |                          |
| 3-Feruloylquinic acid                   | 320               | 367                         | 193,134                             | 149                      |
| 3-Caffeoylquinic acid                   | 234, 326          | 353                         | 191, 179, 135                       | 173, 127, 85             |
| 3- <i>p</i> -Coumaroylquinic acid       | 312               | 337                         | 163                                 |                          |
| 4-Caffeoylquinic acid                   | 234, 328          | 353                         | 173, 179                            |                          |
| 4- <i>p</i> -Coumaroylquinic acid       | 312               | 337                         | 173, 163, 155, 137, 191             |                          |
| 5- <i>p</i> -Coumaroylquinic acid 1     | 312               | 337                         | 191,173,163                         |                          |
| 5- <i>p</i> -Coumaroylquinic acid 2     | 311               | 337                         | 191,163,173                         |                          |
| 5-Caffeoylquinic acid 1                 | 234,328           | 353                         | 191,179,135                         | 173,127,85               |
| 5-Caffeoylquinic acid 2                 | 234,328           | 353                         | 191,179,135                         |                          |
| <i>cis</i> -Coutaric acid               | 310               | 295                         | 163                                 |                          |
| Dicaffeoylquinic acid 1                 | 334               | 515                         | 353                                 | 191                      |
| Dicaffeoylquinic acid 2                 | 333               | 515                         | 353                                 | 191                      |
| Caffeic acid hexoside                   | 330               | 341                         | 179                                 |                          |
| <i>p</i> -Coumaric acid hexoside        | 311               | 325                         | 163                                 |                          |
| Caftaric acid 1                         | 328               | 311                         | 149,179                             |                          |
| Caftaric acid 2                         | 328               | 311                         | 149,179                             |                          |
| Ferulic acid pentoside                  | 290,310           | 325                         | 163                                 |                          |
| <i>trans</i> -Coutaric acid             | 310               | 295                         | 163                                 |                          |
| <i>p</i> -Coumaric acid                 | 310               | 163                         | 119                                 |                          |
| <b>Flavanols</b>                        |                   |                             |                                     |                          |
| Epicatechin                             | 234,279           | 289                         | 245                                 |                          |
| Catechin hexoside                       | 235,280           | 451                         | 289                                 |                          |
| Catechin gallate                        | 235,280           | 441                         | 289                                 |                          |
| Procyanidin dimer 1                     | 278               | 577                         | 425,451,407,289                     |                          |
| Procyanidin dimer 2                     | 278               | 577                         | 425,451,407,289                     |                          |
| Procyanidin dimer 3                     | 279               | 577                         | 425,407,289                         |                          |
| Procyanidin tetramer 1                  | 234,278           | 1153                        | 1135, 1027, 983, 865, 863, 577      |                          |
| Procyanidin tetramer 2                  | 234,278           | 1153                        | 1135, 1027, 983, 865, 863, 695,577, |                          |
| Procyanidin tetramer 3                  | 234,278           | 1153                        | 1027, 983, 865, 577, 575            |                          |
| Procyanidin tetramer 4                  | 234,278           | 1153                        | 1135, 1027, 983, 865, 863, 577      |                          |
| Procyanidin trimer 1                    | 234,278           | 865                         | 577,407,289                         |                          |
| Procyanidin trimer 2                    | 234,278           | 865                         | 577,425,407,289                     |                          |
| Procyanidin trimer 3                    | 235,280           | 865                         | 577,425,407,289                     |                          |
| Procyanidin trimer 4                    | 236,279           | 865                         | 577,425,289                         |                          |
| Procyanidin trimer 5                    | 234,280           | 865                         | 577,407,289                         |                          |
| Procyanidin trimer 6                    | 235,279           | 865                         | 577,425,407,289                     |                          |
| Procyanidin trimer 7                    | 234,280           | 865                         | 577,425,407,289                     |                          |
| <b>Flavones</b>                         |                   |                             |                                     |                          |
| Apigenin hexoside                       | 268,334           | 431                         | 269                                 |                          |
| <b>Flavonols</b>                        |                   |                             |                                     |                          |
| Isorhamnetin hexoside                   | 255,352           | 477                         | 315                                 |                          |
| Kaempferol hexoside                     | 266,346           | 447                         | 285                                 |                          |
| Kaempferol-3-rhamnoside                 | 266, 347          | 431                         | 285                                 |                          |
| Kaempferol-3-rutinoside                 | 264,345           | 593                         | 285                                 |                          |
| Quercetin-3-xyloside                    | 356,255           | 433                         | 301                                 |                          |
| Quercetin-3-arabinofuranoside           | 355,255           | 433                         | 301                                 |                          |
| Quercetin acetyl hexoside               | 255,355           | 505                         | 463                                 | 301                      |
| Quercetin dihexoside                    | 255,356           | 625                         | 301                                 |                          |
| Quercetin-3-arabinopyranoside           | 256, 352          | 433                         | 301                                 |                          |
| Quercetin-3-galactoside                 | 256,356           | 463                         | 301                                 |                          |
| Quercetin-3-glucoside                   | 255,355           | 463                         | 301                                 |                          |

| Phenolic group                | $\lambda$<br>(nm) | [M-H] <sup>-</sup><br>(m/z) | MS <sup>2</sup><br>(m/z) | MS <sup>3</sup><br>(m/z) |
|-------------------------------|-------------------|-----------------------------|--------------------------|--------------------------|
| Quercetin-3-rhamnoside        | 266,356           | 447                         | 301                      |                          |
| Quercetin-3-rutinoside        | 255,355           | 609                         | 301                      |                          |
| Myricetin-3-rhamnoside        | 261, 349          | 463                         | 317                      |                          |
| <b>Quinones</b>               |                   |                             |                          |                          |
| Emodin hexoside               | 282,450           | 431                         | 269                      |                          |
| <b>Stilbenes</b>              |                   |                             |                          |                          |
| Astringin                     | 331,305           | 405                         | 243,225,199              |                          |
| <i>cis</i> -Resveratrolside   | 311               | 389                         | 227,371,209              |                          |
| Piceatannol hexoside 1        | 324,290,306       | 405                         | 243                      |                          |
| Piceatannol hexoside 2        | 324,290,306       | 405                         | 243                      |                          |
| <i>trans</i> -Resveratrolside | 311               | 389                         | 227                      |                          |
| <i>trans</i> -Piceid 1        | 318,306,229       | 389                         | 227,185                  |                          |
| <i>trans</i> -Piceid 2        | 318,306,229       | 389                         | 227,185                  |                          |
